# Supplementary material for: Identification of microRNAs in response to aluminum stress in the roots of Tibetan wild barley and cultivated barley
Source: PubMed Central journal article supplement (PMC6069884; doi:10.1186/s12864-018-4953-x), 2018-07-31
Supplement: 12864_2018_4953_MOESM1_ESM.pdf [file 12864_2018_4953_MOESM1_ESM.pdf]

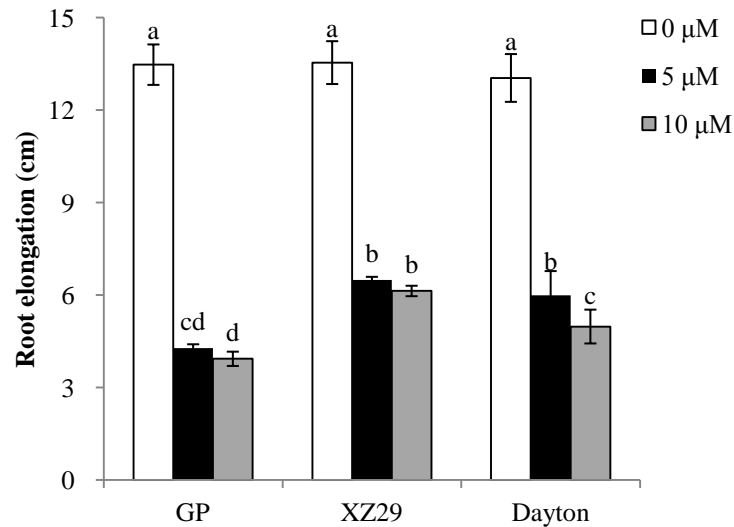

Additional file1: Figure S1. The difference in root elongation of three genotypes under Al stress.

Three-day-old seedlings were exposed to Al for 9 days. The root elongation were measured. Data are means  $\pm$ SD of six biological replicates and means labeled with different letters are significantly different at  $p < 0.05$  by Tukey' test.
