# Supplementary material for: Identification of microRNAs in response to aluminum stress in the roots of Tibetan wild barley and cultivated barley
Source: PubMed Central journal article supplement (PMC6069884; doi:10.1186/s12864-018-4953-x), 2018-07-31
Supplement: 12864_2018_4953_MOESM2_ESM.pdf [file 12864_2018_4953_MOESM2_ESM.pdf]

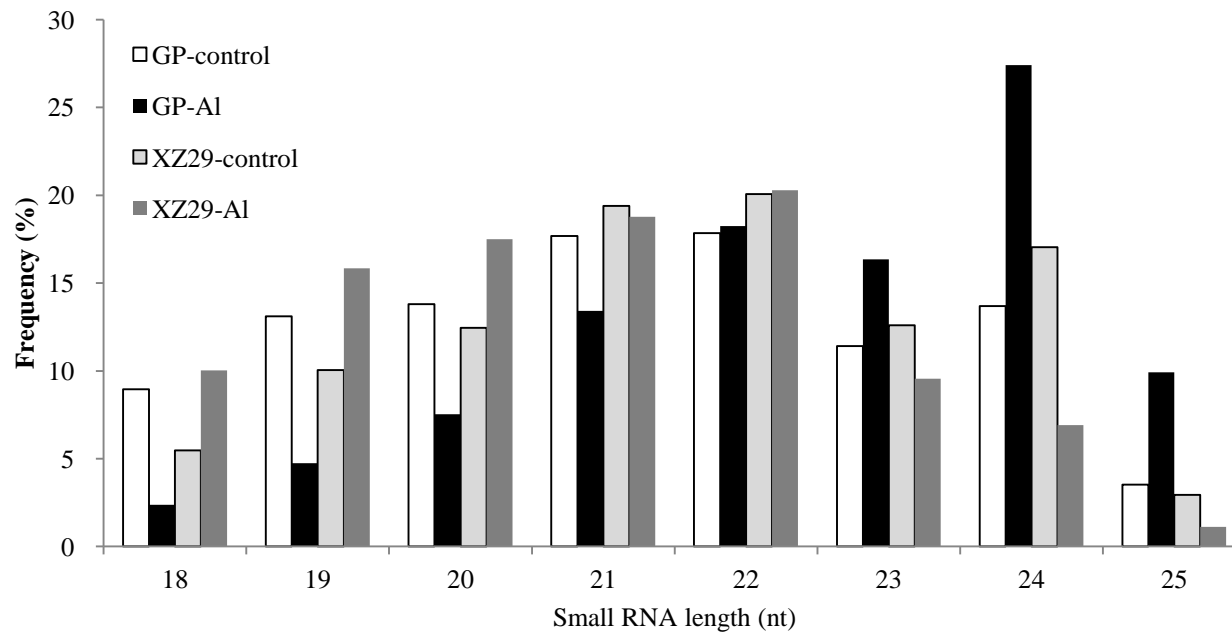

Additional file2: Figure S2. Length distribution of small RNAs in control and Al-treated roots of Golden Promise and XZ29.
